# Supplementary material for: Adjustable oil adhesion on superamphiphobic copper surfaces for controlled oil droplet transport
Source: Royal Society of Chemistry journal article supplement (doi:10.1039/d3ta05800j), 2023-11-22
Supplement: d3ta05800j9.pdf [file d3ta05800j9.pdf]

## Supporting Information

### Adjustable Oil Adhesion on Superamphiphobic Copper Surfaces for Controlled Oil Droplet Transport

Wen Si,<sup>a</sup> Xin Dai,<sup>a</sup> Shiping He,<sup>a</sup> Zhiguang Guo\*<sup>a,b</sup>

<sup>a</sup> Ministry of Education Key Laboratory for the Green Preparation and Application of Functional Materials, Hubei University, Wuhan 430062, People's Republic of China

<sup>b</sup> State Key Laboratory of Solid Lubrication, Lanzhou Institute of Chemical Physics, Chinese Academy of Sciences, Lanzhou 730000, People's Republic of China.

\*E-mail: [zguo@licp.cas.cn](mailto:zguo@licp.cas.cn); Fax: +86-931-8277088; Tel.: +86-931-4968105

Table S1. Superoleophobicity and applications of superamphiphobic copper and other metal surfaces in the past five years.

| Materials              | Modifier | Fabrication Methods                                                   | Repelled Liquids<br>$\gamma$ (mN m <sup>-1</sup> ) | Application                                                                                   | Ref.               |
|------------------------|----------|-----------------------------------------------------------------------|----------------------------------------------------|-----------------------------------------------------------------------------------------------|--------------------|
| Cu                     | PTFE/PP  | Dip Coating,<br>Water Transfer Printing                               | Glycol (47.7)                                      | Self-cleaning                                                                                 | [1]                |
| Al Sheets and<br>Pipes | FAS      | Sol-gel;<br>Spray Coating                                             | Hexadecane ( $\gamma=27.4$ )<br>Crude oil          | Anti-waxing mechanism;<br>Crude oil transportation (anti-<br>crude oil)                       | [2]                |
| Al alloys              | PFDTES   | One-step etching                                                      | Hexadecane ( $\gamma=27.4$ )                       | Anti-corrosion                                                                                | [3]                |
| Cu                     | PFOA     | Compression molding; Simple<br>oxidation                              | 30% ethanol ( $\gamma=33.5$ )                      | Anti-corrosion                                                                                | [4]                |
| Cu                     | PFDT     | Oxidation;<br>Displacement reaction;<br>Modification                  | 30% ethanol ( $\gamma=33.5$ )                      | Anti-corrosion                                                                                | [5]                |
| Cu                     | FTS      | Plasma activation                                                     | Diiodomethane<br>( $\gamma=70.21$ )                | Anti-corrosion                                                                                | [6]                |
| Ni/Cu                  | PFOTS    | Electrochemical-deposited                                             | Glycol (47.7)                                      | Anti-corrosion                                                                                | [7]                |
| Cu                     | PFDT     | Laser marking<br>Oxidation;<br>Displacement reaction;<br>Modification | Hexadecane ( $\gamma=27.4$ )<br>Crude oil          | Anti-corrosion ;<br>Adjustable oil adhesion ;<br>Controlled transportation of<br>oil droplets | In this<br>article |

Table S2. Laser Marking Parameter Setting.

| Square groove (mm) | Incremental (mm) | Array | Marking times |
|--------------------|------------------|-------|---------------|
| 0.01*0.01          | 0.01             | 750   | 10            |
| 0.02*0.02          | 0.01             | 500   | 10            |
| 0.03*0.03          | 0.01             | 375   | 10            |
| 0.04*0.04          | 0.01             | 300   | 10            |
| 0.05*0.05          | 0.01             | 250   | 10            |
| 0.06*0.06          | 0.01             | 215   | 10            |
| 0.07*0.07          | 0.01             | 188   | 10            |
| 0.08*0.08          | 0.01             | 167   | 10            |
| 0.09*0.09          | 0.01             | 150   | 10            |
| 0.1*0.1            | 0.01             | 137   | 10            |

|                   | Water                                                                                             | Ethanediol                                                                                        | Glycerol                                                                                           | Sunflower oil                                                                                       |
|-------------------|---------------------------------------------------------------------------------------------------|---------------------------------------------------------------------------------------------------|----------------------------------------------------------------------------------------------------|-----------------------------------------------------------------------------------------------------|
| F-CuO             | 146±0.5°<br>     | 141.3±0.7°<br>   | 141.5±0.5°<br>   | 124.6±0.9°<br>   |
| F-CuO/Ag          | 149.7±0.6°<br>   | 145.7±2.7°<br>   | 143.6±0.5°<br>   | 140.8±0.7°<br>   |
| F-CuO/Ag<br>-0.01 | 152.8±0.8°<br>   | 154.8±1.3°<br>   | 150.8±0.8°<br>   | 145.8±0.8°<br>   |
| F-CuO/Ag<br>-0.02 | 154.6±1.2°<br>   | 152.7±1.6°<br>   | 152.7±0.6°<br>   | 150.9±0.7°<br>   |
| F-CuO/Ag<br>-0.03 | 152.6±1.1°<br>   | 150.2±0.2°<br>   | 151.3±0.6°<br>   | 151.3±0.3°<br>   |
| F-CuO/Ag<br>-0.04 | 154.8±2.8°<br>   | 152±1.3°<br>     | 150.5±0.2°<br>   | 148.9±1.5°<br>   |
| F-CuO/Ag<br>-0.05 | 152.9±0.9°<br> | 151.0±0.8°<br> | 152.2±0.9°<br> | 150.5±0.5°<br> |
| F-CuO/Ag<br>-0.06 | 153.5±1.3°<br> | 154.6±2.6°<br> | 153.3±0.8°<br> | 150.8±0.6°<br> |
| F-CuO/Ag<br>-0.07 | 151±1°<br>     | 151.2±0.4°<br> | 150.3±2.1°<br> | 142.2±0.4°<br> |
| F-CuO/Ag<br>-0.08 | 151.1±0.4°<br> | 152.3±2.5°<br> | 149.3±1.5°<br> | 147.2±3.2°<br> |
| F-CuO/Ag<br>-0.09 | 150.3±0.4°<br> | 151.5±1.2°<br> | 151.2±1.3°<br> | 142.1±0.6°<br> |
| F-CuO/Ag<br>-0.10 | 151.2±1.1°<br> | 149.9±0.7°<br> | 149.7±2.2°<br> | 144.8±1°<br>   |

Figure S1. Optical photographs of the contact angles of F-CuO, F-CuO/Ag and F-CuO/Ag-0.01~0.1 on water, ethylene glycol, glycerol and colza oil.

### Movie S1-S4 Self-cleaning and anti-fouling

Movie S1. Self-cleaning methylene blue powder

Movie S2. Self-cleaning carbon black powder

Movie S3. Methylene blue stain for water

Movie S4. Crude oil antifouling

### Movie S5-S7 Controlled oil droplet transportation

Movie S5. Controlled Transportation of Glycerol

Movie S6. Controlled transportation of colza oil

Movie S7. Controlled transportation of n-Hexadecane

Movie S8. Controlled transportation of Crude oil

1. K. Liao and J. Zhu, *Colloids and Surfaces A: Physicochemical and Engineering Aspects*, 2022, **639**.
2. J. Peng, S. Yuan, H. Geng, X. Zhang, M. Zhang, F. Xu, D. Lin, Y. Gao and H. Wang, *Chemical Engineering Journal*, 2022, **428**.
3. Y. Li, W. Si and R. Gao, *Surface and Coatings Technology*, 2022, **430**.
4. J. Zhu and K. Liao, *ACS Appl Mater Interfaces*, 2021, **13**, 37830-37839.
5. Q. Wen, F. Guo, Y. Peng and Z. Guo, *Colloids and Surfaces A: Physicochemical and Engineering Aspects*, 2018, **539**, 11-17.
6. J. Cai, T. Wang, W. Hao, H. Ling, T. Hang, Y.-W. Chung and M. Li, *Applied Surface Science*, 2019, **464**, 140-145.
7. T. Wang, J. Cai, Y. Wu, T. Hang, A. Hu, H. Ling and M. Li, *ACS Appl Mater Interfaces*, 2019, **11**, 11106-11111.
